# Supplementary material
Source: publisher figshare collection journal article supplement (https://acs.figshare.com/ndownloader/files/26824803)
Supplement: Supplementary file 1 [file 26824803]

**Supporting Information for Manuscript Entitled:**

**Dynamics of Topological Network formed by Movable Crosslinks: Effect of Sliding Motion on Dielectric and Viscoelastic Relaxation Behavior**

Yu Kashiwagi<sup>1</sup>, Osamu Urakawa<sup>1\*</sup>, Sheng Zhao<sup>4</sup>, Yoshinori Takashima<sup>1,2</sup>, Akira Harada<sup>3</sup>,  
Tadashi Inoue<sup>1\*</sup>

1. Department of Macromolecular Science, Graduate School of Science, Osaka University, Toyonaka, Osaka 560-0043, Japan

2. Institute for Advanced Co-Creation Studies, Osaka University, Suita, Osaka 565-0871, Japan

3. The Institute of Scientific and Industrial Research, Osaka University, Ibaraki, Osaka 567-0047, Japan

4. Department of Chemistry, University of Tennessee, Knoxville, Knoxville, Tennessee 37996, United States

## **Content**

1. Rheological and dielectric spectra of PEA-Ac $\beta$ CD( $x$ )
2. Molar concentration and temperature dependences of the relaxation strength for the slow mode in PEA-Ac $\gamma$ CD( $x$ ) and PEA-Ac $\beta$ CD( $x$ )
3. Arrhenius fittings of PEA-Ac $\gamma$ CD( $x$ ) and PEA-Ac $\beta$ CD( $x$ )
4. Dielectric spectra of PEA /  $\gamma$ CD monomer and PBA/ $\beta$ CD monomer mixtures

## 1. Rheological and dielectric spectra of PEA-Ac $\beta$ CD(x)

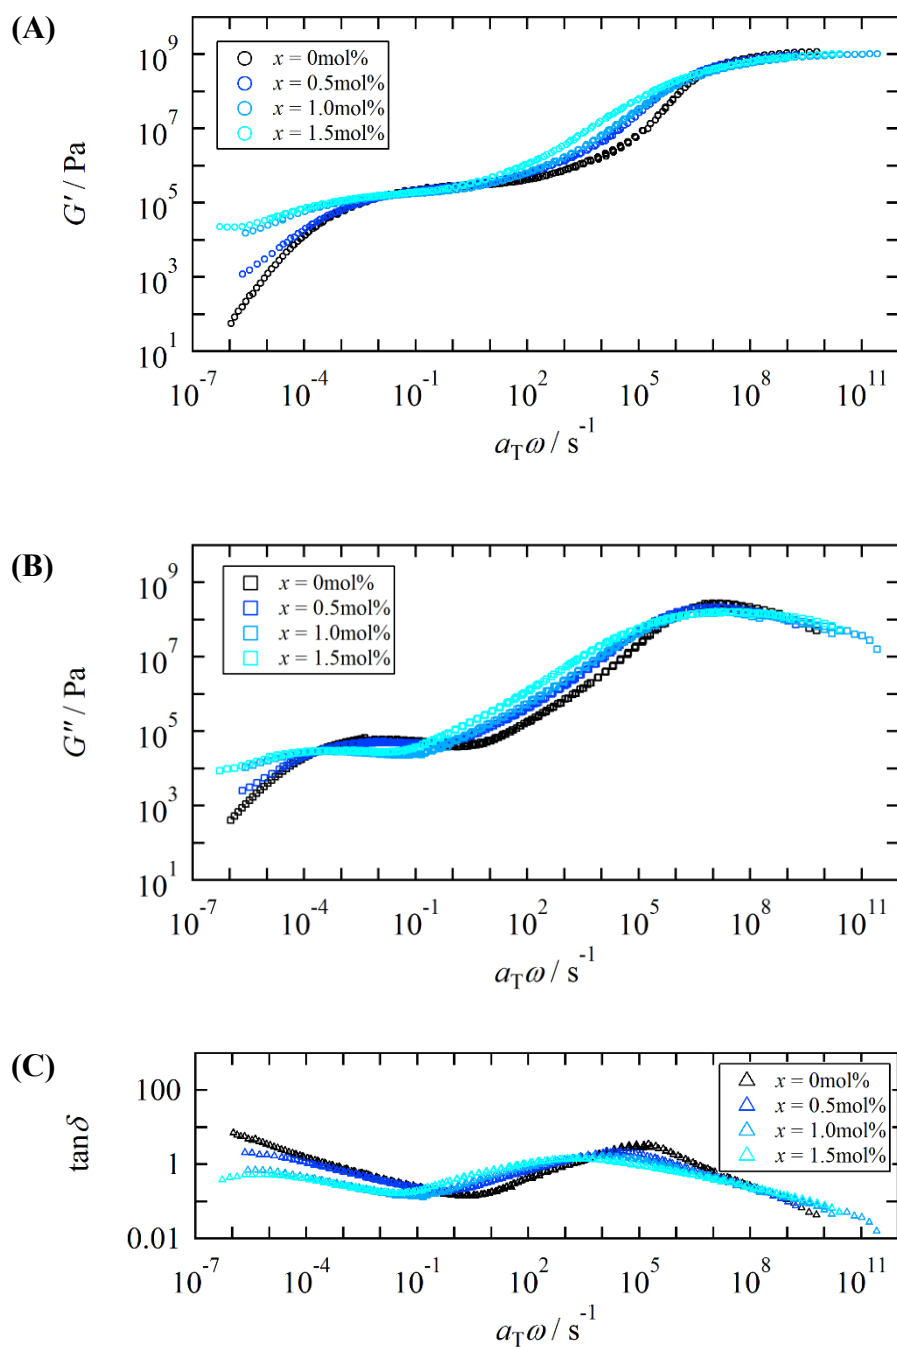

Figure S1. Composite curves of PEA-Ac $\beta$ CD(x) at  $T_r = T_g + 50$  °C. Circle, square, and triangle represent (A) storage modulus, (B) loss modulus, and (C) loss tangent, respectively.

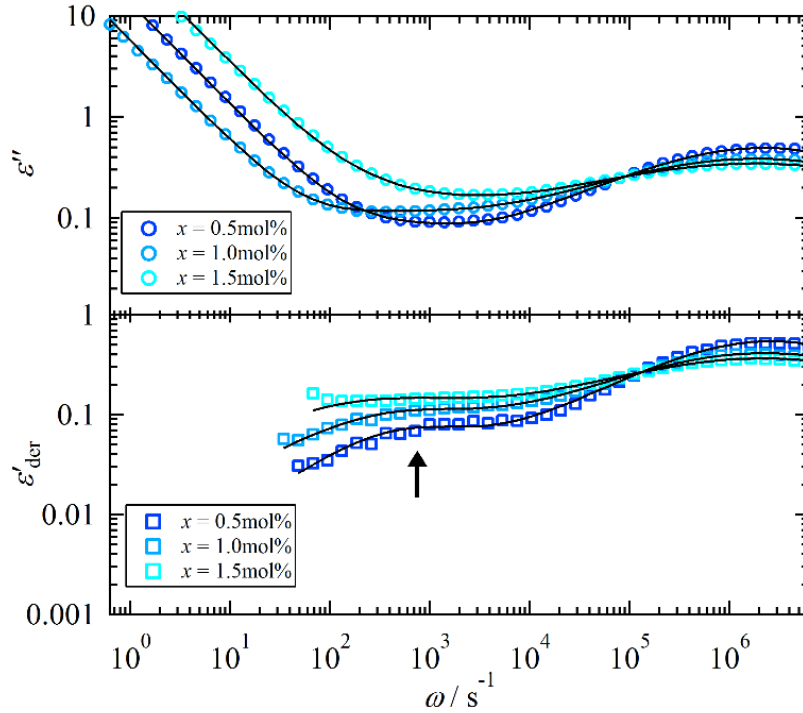

Figure S2. Frequency dependence of dielectric loss  $\varepsilon''$  and derivative of permittivity  $\varepsilon'_{\text{der}}$  for PEA-Ac $\beta$ CD( $x$ ) of  $x_{\text{ini}} = 1.0$  mol % at  $T_g + 50^\circ\text{C}$ . Black lines represent the fitting results derived from Havriliak-Negami functions. Black arrows represent the new relaxation peak derived from the movable crosslink.

## 2. Molar concentration and temperature dependences of the relaxation strength for the slow mode in PEA-Ac $\gamma$ CD( $x$ ) and PEA-Ac $\beta$ CD( $x$ )

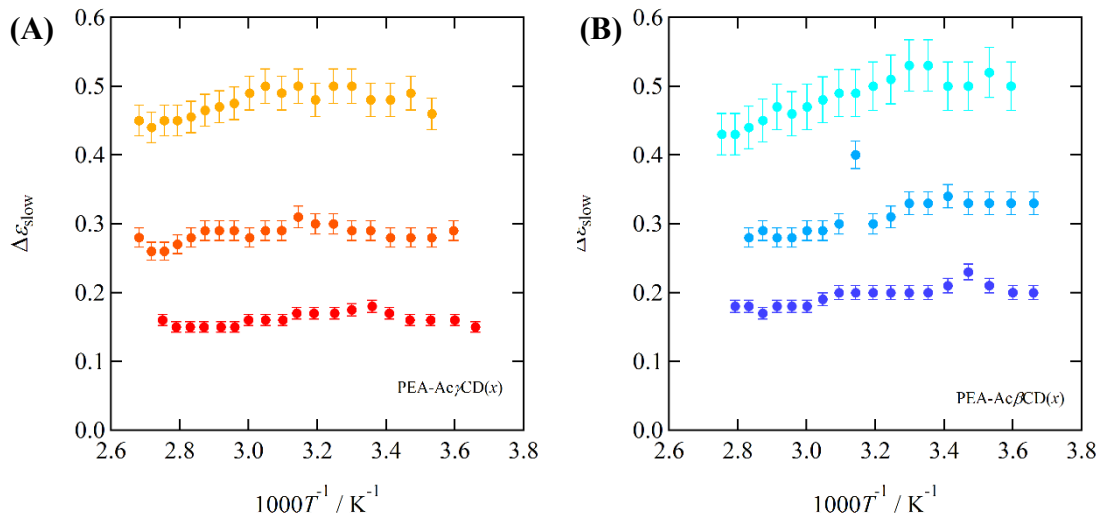

Figure S3. Temperature dependence of relaxation strength of the slow mode for (A) PEA-Ac $\gamma$ CD( $x$ ) and (B) PEA-Ac $\beta$ CD( $x$ ).

### 3. Arrhenius fittings of PEA-Ac $\gamma$ CD(x) and PEA-Ac $\beta$ CD(x)

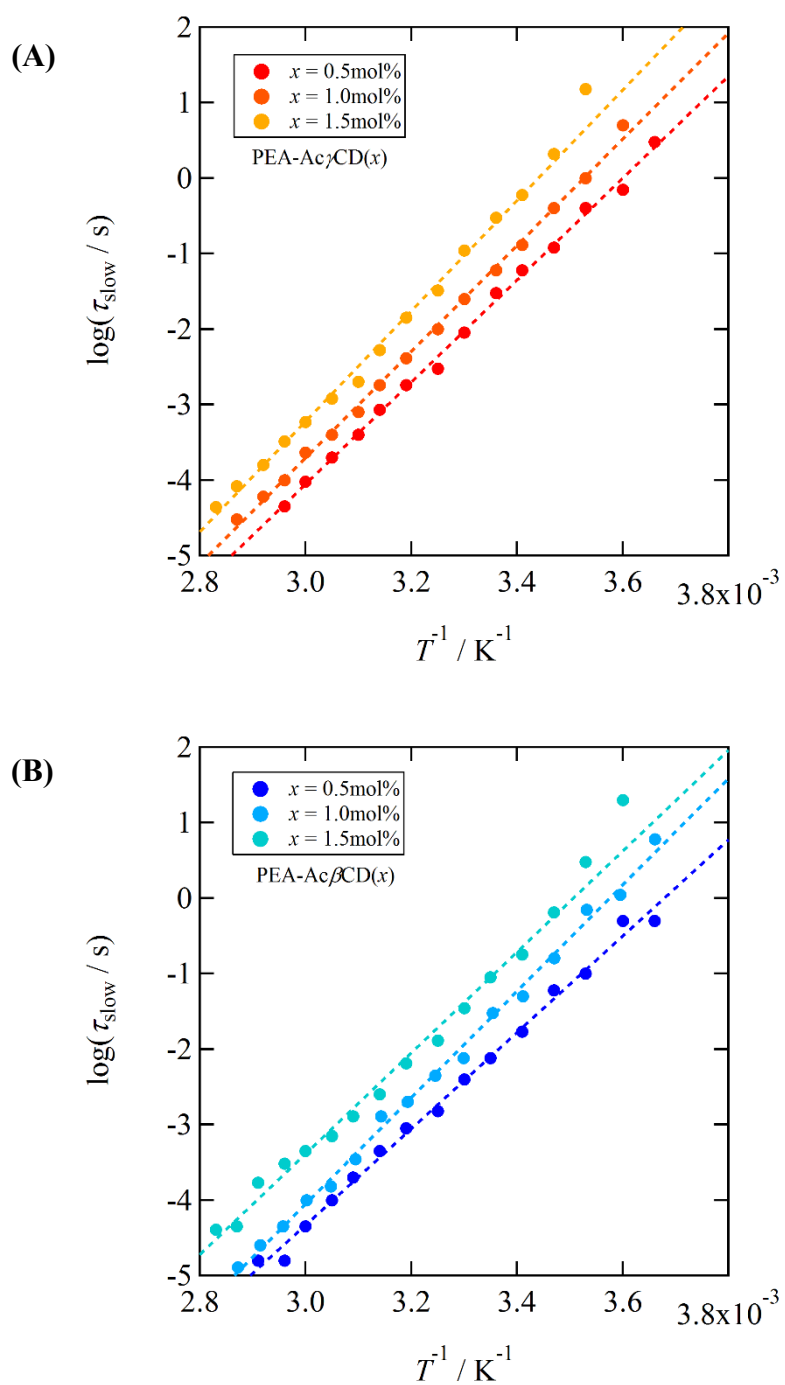

Figure S4. Arrhenius fittings of the slow mode of (A) PEA-Ac $\gamma$ CD(x) and (B) PEA-Ac $\beta$ CD(x).

Table S1. Fitting parameters used in the Arrhenius equation in equation (4).

|                           | $x / \text{mol}\%$ | $\log(\tau_0 / \text{s})$ | $E_a / \text{kJ mol}^{-1}$ |
|---------------------------|--------------------|---------------------------|----------------------------|
| PEA-Ac $\gamma$ CD( $x$ ) | 0.5                | -24.3                     | 129                        |
|                           | 1.0                | -24.8                     | 135                        |
|                           | 1.5                | -25.2                     | 140                        |
| PEA-Ac $\beta$ CD( $x$ )  | 0.5                | -23.5                     | 122                        |
|                           | 1.0                | -25.2                     | 135                        |
|                           | 1.5                | -23.4                     | 128                        |

#### 4. Dielectric results of PEA/ $\gamma$ CD monomer and PBA/ $\beta$ CD monomer mixture

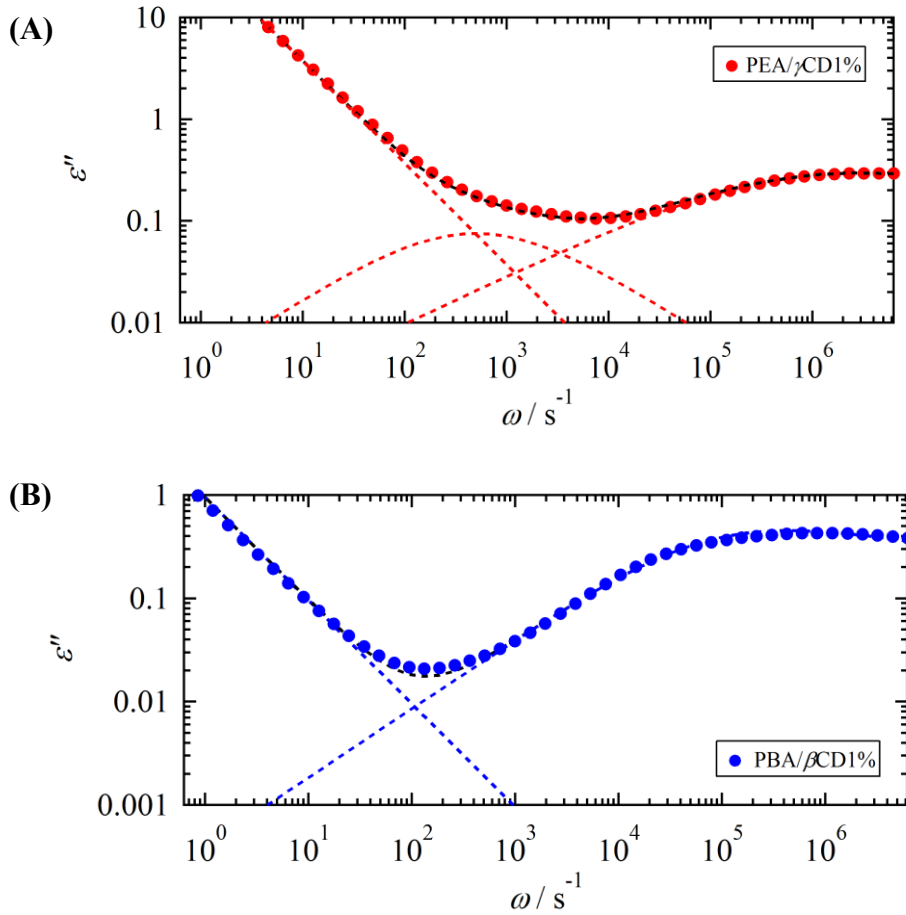

Figure S5. Frequency dependence of dielectric loss  $\epsilon''$  for (A) PEA / Ac $\gamma$ CD monomer mixture and (B) PBA / Ac $\beta$ CD monomer mixture with the molar concentration of the Ac $\gamma$ CD monomer or Ac $\beta$ CD monomer to be 1.0mol% at  $T = 313\text{K}$ . The dashed lines represent the fitting results with eq 1.
